# Supplementary material for: The effect of tobacco control policy on smoking cessation in relation to gender, age and education in Lithuania, 1994–2010
Source: PubMed Central journal article supplement (PMC4349467; doi:10.1186/s12889-015-1525-8), 2015-02-25
Supplement: 12889_2015_1525_MOESM1_ESM.pdf [file 12889_2015_1525_MOESM1_ESM.pdf]

# LITHUANIAN HEALTH BEHAVIOUR MONITOR

## SMOKING QUESTIONNAIRE

### 1. Sex

- 1 male
- 2 female

### 2. Year of birth 19

### 3. Education

- 1 Primary school
- 2 Incompleted secondary school
- 3 Secondary school
- 4 Vocational school
- 5 University

### 4. How many hours a day do you spend at your workplace where somebody smokes?

- 1 more than 5 hours
- 2 between 1-5 hours
- 3 less than one hour a day
- 4 almost never
- 5 I do not work outside the home

### 5. Do you or any family members smoke at home?

- 1 nobody smokes
- 2 yes, somebody smokes

### 6. Have you ever smoked in your life?

- 1 no
- 2 yes

### 7. Have you ever smoked at least 100 cigarettes, cigars or pipefuls in your lifetime?

- 1 no (proceed to question 9)
- 2 yes

### 8. Have you ever smoked daily (=almost every day for at least one year)? If so, how many years altogether?

- 1 no
- 2 yes, I have smoked daily for a total of  years

### 9. Do you smoke at the present time (cigarettes, cigars, pipe)?

- 1 yes, daily
- 2 occasionally
- 3 not at all

### 10. When did you last smoke? If you smoke currently, please circle alternative 1.

- 1 yesterday or today
- 2 2 days - 1 month ago
- 3 1 month - half a year ago
- 4 half a year to one year ago

- 5 1-5 years ago
- 6 5-10 years ago
- 7 more than ten years ago

**11. How much do you smoke or did you smoke before you stopped, on an average per day?**

Please give an answer to each item.

filter cigarettes        cigarettes per day

non-filter cigarettes   cigarettes per day

self-rolled cigarettes   cigarettes per day

pipe                        pipefuls a day

cigars                      cigars a day
